# Supplementary material for: Diversity of Treponema denticola and Other Oral Treponeme Lineages in Subjects with Periodontitis and Gingivitis
Source: PubMed Central journal article supplement (PMC8557910; doi:10.1128/spectrum.00701-21), 2021-09-29
Supplement: spectrum00701-21_supp_1_seq9.pdf [file spectrum00701-21_supp_1_seq9.pdf]

## **SUPPLEMENTARY MATERIAL**

### **Diversity of *Treponema denticola* and other oral treponeme lineages in subjects with periodontitis and gingivitis**

**Huihui Zeng<sup>a+</sup>, Yuki Chan<sup>a+</sup>, Wenling Gao<sup>a,b</sup>, W. Keung Leung<sup>a</sup>, Rory M. Watt<sup>a\*</sup>**

<sup>a</sup> Faculty of Dentistry, The University of Hong Kong, Hong Kong SAR, China

<sup>b</sup> Current affiliation: Guanghua School of Stomatology, Hospital of Stomatology, Guangdong Provincial Key Laboratory of Stomatology, Sun Yat-sen University, Guangzhou, PR China

+These authors contributed equally

Correspondence to: Dr. Rory M. Watt: [rmwatt@hku.hk](mailto:rmwatt@hku.hk)

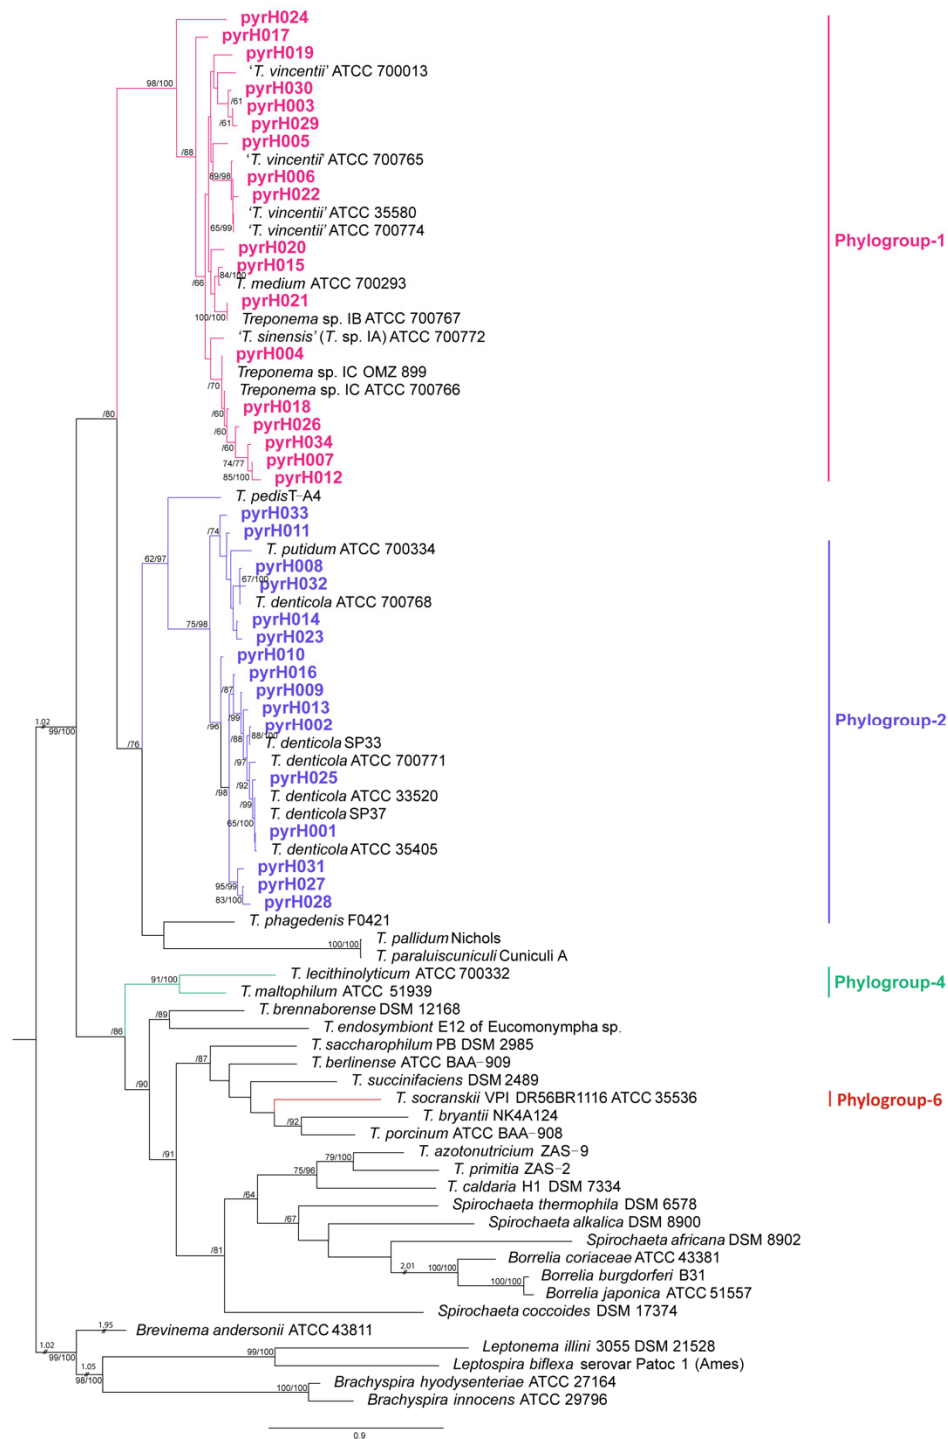

**Figure S1 Maximum Likelihood phylogenetic tree of treponeme *pyrH* genes.** The 34 *pyrH* genotypes identified in this study are indicated with bold-text. The pink and purple font colors indicate genotypes belonging to oral phylogroup 1 and 2, respectively. A scale bar indicates 0.9 nucleotide changes per position. Other explanatory details refer to Fig. 1.

**Table S1 Number of cloned *pyrH* gene sequences and genotypes obtained within each subject.**

| Subject no.  | Number of <i>pyrH</i> sequences obtained |                         |                         | Number of <i>pyrH</i> genotypes identified |                         |                         |
|--------------|------------------------------------------|-------------------------|-------------------------|--------------------------------------------|-------------------------|-------------------------|
|              | Total                                    | Phylogroup-1 treponemes | Phylogroup-2 treponemes | Total                                      | Phylogroup-1 treponemes | Phylogroup-2 treponemes |
| P1           | 59                                       | 29                      | 30                      | 8                                          | 5                       | 3                       |
| P2           | 63                                       | 30                      | 33                      | 11                                         | 6                       | 5                       |
| P3           | 66                                       | 30                      | 36                      | 12                                         | 6                       | 6                       |
| P4           | 60                                       | 30                      | 30                      | 4                                          | 2                       | 2                       |
| P5           | 60                                       | 30                      | 30                      | 5                                          | 3                       | 2                       |
| P6           | 60                                       | 30                      | 30                      | 6                                          | 3                       | 3                       |
| P7           | 76                                       | 30                      | 46                      | 6                                          | 4                       | 2                       |
| P8           | 80                                       | 30                      | 50                      | 5                                          | 3                       | 2                       |
| P9           | 81                                       | 29                      | 52                      | 8                                          | 2                       | 6                       |
| P10          | 59                                       | 29                      | 30                      | 8                                          | 4                       | 4                       |
| G1           | 79                                       | 30                      | 49                      | 4                                          | 3                       | 1                       |
| G2           | 83                                       | 30                      | 53                      | 5                                          | 3                       | 2                       |
| G3           | 81                                       | 30                      | 51                      | 5                                          | 3                       | 2                       |
| G4           | 63                                       | 30                      | 33                      | 5                                          | 3                       | 2                       |
| G5           | 59                                       | 30                      | 29                      | 4                                          | 3                       | 1                       |
| G6           | 60                                       | 30                      | 30                      | 5                                          | 4                       | 1                       |
| G7           | 60                                       | 30                      | 30                      | 7                                          | 4                       | 3                       |
| G8           | 55                                       | 29                      | 26                      | 5                                          | 4                       | 1                       |
| <b>Total</b> | <b>1,204</b>                             | <b>536</b>              | <b>668</b>              | <b>34</b>                                  | <b>18</b>               | <b>16</b>               |

**Phylogroup-1 treponemes:** Number of treponeme phylogroup 1 *pyrH* gene sequences or genotypes. **Phylogroup-2 treponemes:** Number of treponeme phylogroup 2 *pyrH* gene sequences or genotypes. **Total:** Total number of *pyrH* gene sequences or genotypes.

**(Phylogroup 1) in (P):** Name of treponeme phylogroup 1 *pyrH* genes identified in periodontitis (P) subjects. **(Phylogroup 1) in (G):** Name of treponeme phylogroup 1 *pyrH* genes identified in gingivitis (G) subjects. **(Phylogroup 2) in (P):** Name of treponeme phylogroup 2 *pyrH* genes identified in periodontitis (P) subjects. **(Phylogroup 2) in (G):** Name of treponeme phylogroup 2 *pyrH* genes identified in periodontitis (G) subjects. The identity of the clone is indicated, e.g. Grp1\_P1\_1 refers to the first clone of oral treponeme phylogroup 1 *pyrH* gene sequence from patient P1.

**Table S2. Summary of taxonomy and distributions of oral treponeme *pyrH* genotypes and cloned *pyrH* gene sequences identified in P and G subject groups.**

| <i>pyrH</i> genotype | (P) | (G) | (P+G) | Oral treponeme phylogroup | Species / phylotype            |
|----------------------|-----|-----|-------|---------------------------|--------------------------------|
| pyrH001              | 135 | 191 | 326   | 2                         | <i>T. denticola</i>            |
| pyrH002              | 96  | 99  | 195   | 2                         | <i>T. denticola</i>            |
| pyrH003              | 118 | 51  | 169   | 1                         | <i>Treponema</i> sp. I*        |
| pyrH004              | 15  | 81  | 96    | 1                         | <i>Treponema</i> sp. IC        |
| pyrH005              | 66  | 24  | 90    | 1                         | <i>Treponema</i> sp. I*        |
| pyrH006              | 7   | 58  | 65    | 1                         | ' <i>T. vincentii</i> '        |
| pyrH007              | 53  | 15  | 68    | 1                         | <i>Treponema</i> sp. I*        |
| pyrH008              | 28  | 3   | 31    | 2                         | 'atypical' <i>T. denticola</i> |
| pyrH009              | 32  | 0   | 32    | 2                         | <i>Treponema</i> sp. II*       |
| pyrH010              | 26  | 0   | 26    | 2                         | <i>Treponema</i> sp. II*       |
| pyrH011              | 18  | 7   | 25    | 2                         | <i>Treponema</i> sp. II*       |
| pyrH012              | 20  | 0   | 20    | 1                         | <i>Treponema</i> sp. I*        |
| pyrH013              | 10  | 0   | 10    | 2                         | <i>T. denticola</i>            |
| pyrH014              | 10  | 0   | 10    | 2                         | <i>Treponema</i> sp. II*       |
| pyrH015              | 8   | 0   | 8     | 1                         | <i>T. medium</i>               |
| pyrH016              | 6   | 0   | 6     | 2                         | <i>Treponema</i> sp. II*       |
| pyrH017              | 4   | 0   | 4     | 1                         | <i>Treponema</i> sp. I*        |
| pyrH018              | 0   | 3   | 3     | 1                         | <i>Treponema</i> sp. I*        |
| pyrH019              | 0   | 3   | 3     | 1                         | <i>Treponema</i> sp. I*        |
| pyrH020              | 2   | 0   | 2     | 1                         | <i>Treponema</i> sp. I*        |
| pyrH021              | 2   | 0   | 2     | 1                         | <i>Treponema</i> sp. IB        |
| pyrH022              | 0   | 1   | 1     | 1                         | <i>Treponema</i> sp. I*        |
| pyrH023              | 1   | 0   | 1     | 2                         | <i>Treponema</i> sp. II*       |
| pyrH024              | 1   | 0   | 1     | 1                         | <i>Treponema</i> sp. I*        |
| pyrH025              | 1   | 0   | 1     | 2                         | <i>T. denticola</i>            |
| pyrH026              | 0   | 1   | 1     | 1                         | <i>Treponema</i> sp. I*        |
| pyrH027              | 1   | 0   | 1     | 2                         | <i>Treponema</i> sp. II*       |
| pyrH028              | 1   | 0   | 1     | 2                         | <i>Treponema</i> sp. II*       |
| pyrH029              | 1   | 0   | 1     | 1                         | <i>Treponema</i> sp. I*        |
| pyrH030              | 0   | 1   | 1     | 1                         | <i>Treponema</i> sp. I*        |
| pyrH031              | 1   | 0   | 1     | 2                         | <i>Treponema</i> sp. II*       |
| pyrH032              | 0   | 1   | 1     | 2                         | 'atypical' <i>T. denticola</i> |
| pyrH033              | 1   | 0   | 1     | 2                         | <i>Treponema</i> sp. II*       |
| pyrH034              | 0   | 1   | 1     | 1                         | <i>Treponema</i> sp. I*        |

**(P)** Number of cloned *pyrH* gene sequences corresponding to this *pyrH* genotype obtained from periodontitis (P) subjects. **(G)** Number of cloned *pyrH* gene sequences corresponding to this *pyrH* genotype obtained from gingivitis (G) subjects. **(P+G)** Total number of cloned *pyrH* gene sequences obtained that corresponded to this *pyrH* genotype. Taxonomy is assigned with reference to the sequences described in [Chen T, Yu WH, Izard J, Baranova OV, Lakshmanan A, Dewhirst FE. 2010. The Human Oral Microbiome Database: a web accessible resource for investigating oral microbe taxonomic and genomic information. *Database (Oxford)* 2010:baq013]. \* Indicates that the corresponding oral treponeme species/phylotype cannot be assigned with confidence.

**Table S3. Alpha diversity indices for oral treponeme phylogroup 1 *pyrH* genotypes detected within each subject.**

| <b>Subject</b> | <b>nseqs</b> | <b>Good's coverage</b> | <b>sobs</b> | <b>Simpson</b> | <b>Chao1</b> | <b>Shannon</b> | <b>ACE</b> |
|----------------|--------------|------------------------|-------------|----------------|--------------|----------------|------------|
| P1             | 29           | 0.97                   | 5.00        | 0.37           | 5.00         | 1.21           | 5.36       |
| P2             | 30           | 0.90                   | 6.00        | 0.30           | 9.00         | 1.34           | 18.08      |
| P3             | 30           | 0.93                   | 6.00        | 0.49           | 6.33         | 1.07           | 7.43       |
| P4             | 30           | 1.00                   | 2.00        | 0.49           | 2.00         | 0.69           | 0.00       |
| P5             | 30           | 0.97                   | 3.00        | 0.62           | 3.00         | 0.64           | 4.76       |
| P6             | 30           | 0.97                   | 3.00        | 0.50           | 3.00         | 0.77           | 4.87       |
| P7             | 30           | 0.97                   | 4.00        | 0.39           | 4.00         | 1.01           | 5.00       |
| P8             | 30           | 1.00                   | 3.00        | 0.49           | 3.00         | 0.86           | 3.00       |
| P9             | 29           | 1.00                   | 2.00        | 0.87           | 2.00         | 0.25           | 2.00       |
| P10            | 29           | 1.00                   | 4.00        | 0.31           | 4.00         | 1.23           | 4.00       |
| G1             | 30           | 0.97                   | 2.00        | 0.45           | 3.00         | 0.82           | 0.00       |
| G2             | 30           | 1.00                   | 3.00        | 0.65           | 3.00         | 0.63           | 3.00       |
| G3             | 30           | 1.00                   | 3.00        | 0.49           | 3.00         | 0.86           | 3.00       |
| G4             | 30           | 1.00                   | 4.00        | 0.44           | 3.00         | 0.90           | 3.00       |
| G5             | 30           | 0.97                   | 3.00        | 0.58           | 3.00         | 0.68           | 4.80       |
| G6             | 30           | 0.97                   | 3.00        | 0.64           | 4.00         | 0.70           | 4.60       |
| G7             | 30           | 0.93                   | 4.00        | 0.43           | 5.00         | 0.93           | 0.00       |
| G8             | 29           | 0.97                   | 4.00        | 0.36           | 4.00         | 1.09           | 4.76       |

**Nseq** is the number of sequences observed; **Good's coverage** calculates Good's coverage values; **sobs** is the number of detected genotypes; **Simpson** is the Simpson diversity index; **Chao1** represents the Chao1 richness index; **Shannon** represents the Shannon diversity index; **ACE** is the abundance-based coverage ACE richness estimator.

**Table S4. Alpha diversity indices for oral treponeme phylogroup 2 *pyrH* genotypes detected within periodontitis and gingivitis subjects.**

| <b>Subject</b> | <b>nseqs</b> | <b>Good's coverage</b> | <b>sobs</b> | <b>Simpson</b> | <b>Chao1</b> | <b>Shannon</b> | <b>ACE</b> |
|----------------|--------------|------------------------|-------------|----------------|--------------|----------------|------------|
| P1             | 30           | 0.97                   | 3.00        | 0.75           | 3.00         | 0.47           | 4.11       |
| P2             | 33           | 0.94                   | 5.00        | 0.41           | 6.00         | 1.10           | 7.23       |
| P3             | 36           | 0.94                   | 6.00        | 0.23           | 7.00         | 1.50           | 7.60       |
| P4             | 30           | 1.00                   | 2.00        | 0.49           | 2.00         | 0.68           | 0.00       |
| P5             | 30           | 1.00                   | 2.00        | 0.63           | 2.00         | 0.54           | 2.00       |
| P6             | 30           | 1.00                   | 3.00        | 0.42           | 3.00         | 0.89           | 3.00       |
| P7             | 46           | 0.98                   | 2.00        | 0.96           | 2.00         | 0.10           | 0.00       |
| P8             | 50           | 0.98                   | 2.00        | 0.96           | 2.00         | 0.10           | 0.00       |
| P9             | 52           | 0.96                   | 6.00        | 0.39           | 7.00         | 1.21           | 7.63       |
| P10            | 30           | 0.97                   | 4.00        | 0.29           | 4.00         | 1.20           | 4.54       |
| G1             | 49           | 1.00                   | 1.00        | 1.00           | 1.00         | 0.00           | 0.00       |
| G2             | 53           | 1.00                   | 2.00        | 0.74           | 2.00         | 0.42           | 2.00       |
| G3             | 51           | 1.00                   | 2.00        | 0.92           | 2.00         | 0.17           | 2.00       |
| G4             | 33           | 1.00                   | 2.00        | 0.66           | 2.00         | 0.52           | 2.00       |
| G5             | 29           | 1.00                   | 1.00        | 1.00           | 1.00         | 0.00           | 0.00       |
| G6             | 30           | 1.00                   | 1.00        | 1.00           | 1.00         | 0.00           | 0.00       |
| G7             | 30           | 0.97                   | 3.00        | 0.75           | 3.00         | 0.47           | 4.11       |
| G8             | 26           | 1.00                   | 1.00        | 1.00           | 1.00         | 0.00           | 0.00       |

Explanatory details refer to Table S3.



**Table S5. NCBI GenBank accession numbers for cloned *pyrH* gene sequences identified in this study.**

| (Phylogroup 1) in (P) |           | (Phylogroup 1) in (G) |           | (Phylogroup 2) in (P) |           | (Phylogroup 2) in (G) |           |
|-----------------------|-----------|-----------------------|-----------|-----------------------|-----------|-----------------------|-----------|
| Clone                 | Accession | Clone                 | Accession | Clone                 | Accession | Clone                 | Accession |
| Grp1_P1_1             | MT091982  | Grp1_G1_1             | MT092279  | Grp2_P1_1             | MT092518  | Grp2_G1_1             | MT092885  |
| Grp1_P1_2             | MT091983  | Grp1_G1_2             | MT092280  | Grp2_P1_2             | MT092519  | Grp2_G1_2             | MT092886  |
| Grp1_P1_3             | MT091984  | Grp1_G1_3             | MT092281  | Grp2_P1_3             | MT092520  | Grp2_G1_3             | MT092887  |
| Grp1_P1_4             | MT091985  | Grp1_G1_4             | MT092282  | Grp2_P1_4             | MT092521  | Grp2_G1_4             | MT092888  |
| Grp1_P1_5             | MT091986  | Grp1_G1_5             | MT092283  | Grp2_P1_5             | MT092522  | Grp2_G1_5             | MT092889  |
| Grp1_P1_6             | MT091987  | Grp1_G1_6             | MT092284  | Grp2_P1_6             | MT092523  | Grp2_G1_6             | MT092890  |
| Grp1_P1_7             | MT091988  | Grp1_G1_7             | MT092285  | Grp2_P1_7             | MT092524  | Grp2_G1_7             | MT092891  |
| Grp1_P1_8             | MT091989  | Grp1_G1_8             | MT092286  | Grp2_P1_8             | MT092525  | Grp2_G1_8             | MT092892  |
| Grp1_P1_9             | MT091990  | Grp1_G1_9             | MT092287  | Grp2_P1_9             | MT092526  | Grp2_G1_9             | MT092893  |
| Grp1_P1_10            | MT091991  | Grp1_G1_10            | MT092288  | Grp2_P1_10            | MT092527  | Grp2_G1_10            | MT092894  |
| Grp1_P1_11            | MT091992  | Grp1_G1_11            | MT092289  | Grp2_P1_11            | MT092528  | Grp2_G1_11            | MT092895  |
| Grp1_P1_12            | MT091993  | Grp1_G1_12            | MT092290  | Grp2_P1_12            | MT092529  | Grp2_G1_12            | MT092896  |
| Grp1_P1_13            | MT091994  | Grp1_G1_13            | MT092291  | Grp2_P1_13            | MT092530  | Grp2_G1_13            | MT092897  |
| Grp1_P1_14            | MT091995  | Grp1_G1_14            | MT092292  | Grp2_P1_14            | MT092531  | Grp2_G1_14            | MT092898  |
| Grp1_P1_15            | MT091996  | Grp1_G1_15            | MT092293  | Grp2_P1_15            | MT092532  | Grp2_G1_15            | MT092899  |
| Grp1_P1_16            | MT091997  | Grp1_G1_16            | MT092294  | Grp2_P1_16            | MT092533  | Grp2_G1_16            | MT092900  |
| Grp1_P1_17            | MT091998  | Grp1_G1_17            | MT092295  | Grp2_P1_17            | MT092534  | Grp2_G1_17            | MT092901  |
| Grp1_P1_18            | MT091999  | Grp1_G1_18            | MT092296  | Grp2_P1_18            | MT092535  | Grp2_G1_18            | MT092902  |
| Grp1_P1_19            | MT092000  | Grp1_G1_19            | MT092297  | Grp2_P1_19            | MT092536  | Grp2_G1_19            | MT092903  |
| Grp1_P1_20            | MT092001  | Grp1_G1_20            | MT092298  | Grp2_P1_20            | MT092537  | Grp2_G1_20            | MT092904  |
| Grp1_P1_21            | MT092002  | Grp1_G1_21            | MT092299  | Grp2_P1_21            | MT092538  | Grp2_G1_21            | MT092905  |
| Grp1_P1_22            | MT092003  | Grp1_G1_22            | MT092300  | Grp2_P1_22            | MT092539  | Grp2_G1_22            | MT092906  |
| Grp1_P1_23            | MT092004  | Grp1_G1_23            | MT092301  | Grp2_P1_23            | MT092540  | Grp2_G1_23            | MT092907  |
| Grp1_P1_24            | MT092005  | Grp1_G1_24            | MT092302  | Grp2_P1_24            | MT092541  | Grp2_G1_24            | MT092908  |
| Grp1_P1_25            | MT092006  | Grp1_G1_25            | MT092303  | Grp2_P1_25            | MT092542  | Grp2_G1_25            | MT092909  |
| Grp1_P1_26            | MT092007  | Grp1_G1_26            | MT092304  | Grp2_P1_26            | MT092543  | Grp2_G1_26            | MT092910  |
| Grp1_P1_27            | MT092008  | Grp1_G1_27            | MT092305  | Grp2_P1_27            | MT092544  | Grp2_G1_27            | MT092911  |
| Grp1_P1_28            | MT092009  | Grp1_G1_28            | MT092306  | Grp2_P1_28            | MT092545  | Grp2_G1_28            | MT092912  |
| Grp1_P1_29            | MT092010  | Grp1_G1_29            | MT092307  | Grp2_P1_29            | MT092546  | Grp2_G1_29            | MT092913  |
| Grp1_P4_1             | MT092011  | Grp1_G1_30            | MT092308  | Grp2_P1_30            | MT092547  | Grp2_G1_30            | MT092914  |
| Grp1_P4_2             | MT092012  | Grp1_G2_1             | MT092309  | Grp2_P4_1             | MT092548  | Grp2_G1_31            | MT092915  |
| Grp1_P4_3             | MT092013  | Grp1_G2_2             | MT092310  | Grp2_P4_2             | MT092549  | Grp2_G1_32            | MT092916  |
| Grp1_P4_4             | MT092014  | Grp1_G2_3             | MT092311  | Grp2_P4_3             | MT092550  | Grp2_G1_33            | MT092917  |
| Grp1_P4_5             | MT092015  | Grp1_G2_4             | MT092312  | Grp2_P4_4             | MT092551  | Grp2_G1_34            | MT092918  |
| Grp1_P4_6             | MT092016  | Grp1_G2_5             | MT092313  | Grp2_P4_5             | MT092552  | Grp2_G1_35            | MT092919  |
| Grp1_P4_7             | MT092017  | Grp1_G2_6             | MT092314  | Grp2_P4_6             | MT092553  | Grp2_G1_36            | MT092920  |
| Grp1_P4_8             | MT092018  | Grp1_G2_7             | MT092315  | Grp2_P4_7             | MT092554  | Grp2_G1_37            | MT092921  |
| Grp1_P4_9             | MT092019  | Grp1_G2_8             | MT092316  | Grp2_P4_8             | MT092555  | Grp2_G1_38            | MT092922  |
| Grp1_P4_10            | MT092020  | Grp1_G2_9             | MT092317  | Grp2_P4_9             | MT092556  | Grp2_G1_39            | MT092923  |
| Grp1_P4_11            | MT092021  | Grp1_G2_10            | MT092318  | Grp2_P4_10            | MT092557  | Grp2_G1_40            | MT092924  |
| Grp1_P4_12            | MT092022  | Grp1_G2_11            | MT092319  | Grp2_P4_11            | MT092558  | Grp2_G1_41            | MT092925  |
| Grp1_P4_13            | MT092023  | Grp1_G2_12            | MT092320  | Grp2_P4_12            | MT092559  | Grp2_G1_42            | MT092926  |
| Grp1_P4_14            | MT092024  | Grp1_G2_13            | MT092321  | Grp2_P4_13            | MT092560  | Grp2_G1_43            | MT092927  |
| Grp1_P4_15            | MT092025  | Grp1_G2_14            | MT092322  | Grp2_P4_14            | MT092561  | Grp2_G1_44            | MT092928  |
| Grp1_P4_16            | MT092026  | Grp1_G2_15            | MT092323  | Grp2_P4_15            | MT092562  | Grp2_G1_45            | MT092929  |
| Grp1_P4_17            | MT092027  | Grp1_G2_16            | MT092324  | Grp2_P4_16            | MT092563  | Grp2_G1_46            | MT092930  |
| Grp1_P4_18            | MT092028  | Grp1_G2_17            | MT092325  | Grp2_P4_17            | MT092564  | Grp2_G1_47            | MT092931  |
| Grp1_P4_19            | MT092029  | Grp1_G2_18            | MT092326  | Grp2_P4_18            | MT092565  | Grp2_G1_48            | MT092932  |
| Grp1_P4_20            | MT092030  | Grp1_G2_19            | MT092327  | Grp2_P4_19            | MT092566  | Grp2_G1_49            | MT092933  |
| Grp1_P4_21            | MT092031  | Grp1_G2_20            | MT092328  | Grp2_P4_20            | MT092567  | Grp2_G2_1             | MT092934  |
| Grp1_P4_22            | MT092032  | Grp1_G2_21            | MT092329  | Grp2_P4_21            | MT092568  | Grp2_G2_2             | MT092935  |
| Grp1_P4_23            | MT092033  | Grp1_G2_22            | MT092330  | Grp2_P4_22            | MT092569  | Grp2_G2_3             | MT092936  |

| (Phylogroup 1) in (P) |           | (Phylogroup 1) in (G) |           | (Phylogroup 2) in (P) |           | (Phylogroup 2) in (G) |           |
|-----------------------|-----------|-----------------------|-----------|-----------------------|-----------|-----------------------|-----------|
| Clone                 | Accession | Clone                 | Accession | Clone                 | Accession | Clone                 | Accession |
| Grp1_P4_24            | MT092034  | Grp1_G2_23            | MT092331  | Grp2_P4_23            | MT092570  | Grp2_G2_4             | MT092937  |
| Grp1_P4_25            | MT092035  | Grp1_G2_24            | MT092332  | Grp2_P4_24            | MT092571  | Grp2_G2_5             | MT092938  |
| Grp1_P4_26            | MT092036  | Grp1_G2_25            | MT092333  | Grp2_P4_25            | MT092572  | Grp2_G2_6             | MT092939  |
| Grp1_P4_27            | MT092037  | Grp1_G2_26            | MT092334  | Grp2_P4_26            | MT092573  | Grp2_G2_7             | MT092940  |
| Grp1_P4_28            | MT092038  | Grp1_G2_27            | MT092335  | Grp2_P4_27            | MT092574  | Grp2_G2_8             | MT092941  |
| Grp1_P4_29            | MT092039  | Grp1_G2_28            | MT092336  | Grp2_P4_28            | MT092575  | Grp2_G2_9             | MT092942  |
| Grp1_P4_30            | MT092040  | Grp1_G2_29            | MT092337  | Grp2_P4_29            | MT092576  | Grp2_G2_10            | MT092943  |
| Grp1_P5_1             | MT092041  | Grp1_G2_30            | MT092338  | Grp2_P4_30            | MT092577  | Grp2_G2_11            | MT092944  |
| Grp1_P5_2             | MT092042  | Grp1_G3_1             | MT092339  | Grp2_P5_1             | MT092578  | Grp2_G2_12            | MT092945  |
| Grp1_P5_3             | MT092043  | Grp1_G3_2             | MT092340  | Grp2_P5_2             | MT092579  | Grp2_G2_13            | MT092946  |
| Grp1_P5_4             | MT092044  | Grp1_G3_3             | MT092341  | Grp2_P5_3             | MT092580  | Grp2_G2_14            | MT092947  |
| Grp1_P5_5             | MT092045  | Grp1_G3_4             | MT092342  | Grp2_P5_4             | MT092581  | Grp2_G2_15            | MT092948  |
| Grp1_P5_6             | MT092046  | Grp1_G3_5             | MT092343  | Grp2_P5_5             | MT092582  | Grp2_G2_16            | MT092949  |
| Grp1_P5_7             | MT092047  | Grp1_G3_6             | MT092344  | Grp2_P5_6             | MT092583  | Grp2_G2_17            | MT092950  |
| Grp1_P5_8             | MT092048  | Grp1_G3_7             | MT092345  | Grp2_P5_7             | MT092584  | Grp2_G2_18            | MT092951  |
| Grp1_P5_9             | MT092049  | Grp1_G3_8             | MT092346  | Grp2_P5_8             | MT092585  | Grp2_G2_19            | MT092952  |
| Grp1_P5_10            | MT092050  | Grp1_G3_9             | MT092347  | Grp2_P5_9             | MT092586  | Grp2_G2_20            | MT092953  |
| Grp1_P5_11            | MT092051  | Grp1_G3_10            | MT092348  | Grp2_P5_10            | MT092587  | Grp2_G2_21            | MT092954  |
| Grp1_P5_12            | MT092052  | Grp1_G3_11            | MT092349  | Grp2_P5_11            | MT092588  | Grp2_G2_22            | MT092955  |
| Grp1_P5_13            | MT092053  | Grp1_G3_12            | MT092350  | Grp2_P5_12            | MT092589  | Grp2_G2_23            | MT092956  |
| Grp1_P5_14            | MT092054  | Grp1_G3_13            | MT092351  | Grp2_P5_13            | MT092590  | Grp2_G2_24            | MT092957  |
| Grp1_P5_15            | MT092055  | Grp1_G3_14            | MT092352  | Grp2_P5_14            | MT092591  | Grp2_G2_25            | MT092958  |
| Grp1_P5_16            | MT092056  | Grp1_G3_15            | MT092353  | Grp2_P5_15            | MT092592  | Grp2_G2_26            | MT092959  |
| Grp1_P5_17            | MT092057  | Grp1_G3_16            | MT092354  | Grp2_P5_16            | MT092593  | Grp2_G2_27            | MT092960  |
| Grp1_P5_18            | MT092058  | Grp1_G3_17            | MT092355  | Grp2_P5_17            | MT092594  | Grp2_G2_28            | MT092961  |
| Grp1_P5_19            | MT092059  | Grp1_G3_18            | MT092356  | Grp2_P5_18            | MT092595  | Grp2_G2_29            | MT092962  |
| Grp1_P5_20            | MT092060  | Grp1_G3_19            | MT092357  | Grp2_P5_19            | MT092596  | Grp2_G2_30            | MT092963  |
| Grp1_P5_21            | MT092061  | Grp1_G3_20            | MT092358  | Grp2_P5_20            | MT092597  | Grp2_G2_31            | MT092964  |
| Grp1_P5_22            | MT092062  | Grp1_G3_21            | MT092359  | Grp2_P5_21            | MT092598  | Grp2_G2_32            | MT092965  |
| Grp1_P5_23            | MT092063  | Grp1_G3_22            | MT092360  | Grp2_P5_22            | MT092599  | Grp2_G2_33            | MT092966  |
| Grp1_P5_24            | MT092064  | Grp1_G3_23            | MT092361  | Grp2_P5_23            | MT092600  | Grp2_G2_34            | MT092967  |
| Grp1_P5_25            | MT092065  | Grp1_G3_24            | MT092362  | Grp2_P5_24            | MT092601  | Grp2_G2_35            | MT092968  |
| Grp1_P5_26            | MT092066  | Grp1_G3_25            | MT092363  | Grp2_P5_25            | MT092602  | Grp2_G2_36            | MT092969  |
| Grp1_P5_27            | MT092067  | Grp1_G3_26            | MT092364  | Grp2_P5_26            | MT092603  | Grp2_G2_37            | MT092970  |
| Grp1_P5_28            | MT092068  | Grp1_G3_27            | MT092365  | Grp2_P5_27            | MT092604  | Grp2_G2_38            | MT092971  |
| Grp1_P5_29            | MT092069  | Grp1_G3_28            | MT092366  | Grp2_P5_28            | MT092605  | Grp2_G2_39            | MT092972  |
| Grp1_P5_30            | MT092070  | Grp1_G3_29            | MT092367  | Grp2_P5_29            | MT092606  | Grp2_G2_40            | MT092973  |
| Grp1_P6_1             | MT092071  | Grp1_G3_30            | MT092368  | Grp2_P5_30            | MT092607  | Grp2_G2_41            | MT092974  |
| Grp1_P6_2             | MT092072  | Grp1_G4_1             | MT092369  | Grp2_P6_1             | MT092608  | Grp2_G2_42            | MT092975  |
| Grp1_P6_3             | MT092073  | Grp1_G4_2             | MT092370  | Grp2_P6_2             | MT092609  | Grp2_G2_43            | MT092976  |
| Grp1_P6_4             | MT092074  | Grp1_G4_3             | MT092371  | Grp2_P6_3             | MT092610  | Grp2_G2_44            | MT092977  |
| Grp1_P6_5             | MT092075  | Grp1_G4_4             | MT092372  | Grp2_P6_4             | MT092611  | Grp2_G2_45            | MT092978  |
| Grp1_P6_6             | MT092076  | Grp1_G4_5             | MT092373  | Grp2_P6_5             | MT092612  | Grp2_G2_46            | MT092979  |
| Grp1_P6_7             | MT092077  | Grp1_G4_6             | MT092374  | Grp2_P6_6             | MT092613  | Grp2_G2_47            | MT092980  |
| Grp1_P6_8             | MT092078  | Grp1_G4_7             | MT092375  | Grp2_P6_7             | MT092614  | Grp2_G2_48            | MT092981  |
| Grp1_P6_9             | MT092079  | Grp1_G4_8             | MT092376  | Grp2_P6_8             | MT092615  | Grp2_G2_49            | MT092982  |
| Grp1_P6_10            | MT092080  | Grp1_G4_9             | MT092377  | Grp2_P6_9             | MT092616  | Grp2_G2_50            | MT092983  |
| Grp1_P6_11            | MT092081  | Grp1_G4_10            | MT092378  | Grp2_P6_10            | MT092617  | Grp2_G2_51            | MT092984  |
| Grp1_P6_12            | MT092082  | Grp1_G4_11            | MT092379  | Grp2_P6_11            | MT092618  | Grp2_G2_52            | MT092985  |
| Grp1_P6_13            | MT092083  | Grp1_G4_12            | MT092380  | Grp2_P6_12            | MT092619  | Grp2_G2_53            | MT092986  |
| Grp1_P6_14            | MT092084  | Grp1_G4_13            | MT092381  | Grp2_P6_13            | MT092620  | Grp2_G3_1             | MT092987  |
| Grp1_P6_15            | MT092085  | Grp1_G4_14            | MT092382  | Grp2_P6_14            | MT092621  | Grp2_G3_2             | MT092988  |
| Grp1_P6_16            | MT092086  | Grp1_G4_15            | MT092383  | Grp2_P6_15            | MT092622  | Grp2_G3_3             | MT092989  |
| Grp1_P6_17            | MT092087  | Grp1_G4_16            | MT092384  | Grp2_P6_16            | MT092623  | Grp2_G3_4             | MT092990  |
| Grp1_P6_18            | MT092088  | Grp1_G4_17            | MT092385  | Grp2_P6_17            | MT092624  | Grp2_G3_5             | MT092991  |
| Grp1_P6_19            | MT092089  | Grp1_G4_18            | MT092386  | Grp2_P6_18            | MT092625  | Grp2_G3_6             | MT092992  |
| Grp1_P6_20            | MT092090  | Grp1_G4_19            | MT092387  | Grp2_P6_19            | MT092626  | Grp2_G3_7             | MT092993  |
| Grp1_P6_21            | MT092091  | Grp1_G4_20            | MT092388  | Grp2_P6_20            | MT092627  | Grp2_G3_8             | MT092994  |
| Grp1_P6_22            | MT092092  | Grp1_G4_21            | MT092389  | Grp2_P6_21            | MT092628  | Grp2_G3_9             | MT092995  |
| Grp1_P6_23            | MT092093  | Grp1_G4_22            | MT092390  | Grp2_P6_22            | MT092629  | Grp2_G3_10            | MT092996  |

| (Phylogroup 1) in (P) |           | (Phylogroup 1) in (G) |           | (Phylogroup 2) in (P) |           | (Phylogroup 2) in (G) |           |
|-----------------------|-----------|-----------------------|-----------|-----------------------|-----------|-----------------------|-----------|
| Clone                 | Accession | Clone                 | Accession | Clone                 | Accession | Clone                 | Accession |
| Grp1_P6_24            | MT092094  | Grp1_G4_23            | MT092391  | Grp2_P6_23            | MT092630  | Grp2_G3_11            | MT092997  |
| Grp1_P6_25            | MT092095  | Grp1_G4_24            | MT092392  | Grp2_P6_24            | MT092631  | Grp2_G3_12            | MT092998  |
| Grp1_P6_26            | MT092096  | Grp1_G4_25            | MT092393  | Grp2_P6_25            | MT092632  | Grp2_G3_13            | MT092999  |
| Grp1_P6_27            | MT092097  | Grp1_G4_26            | MT092394  | Grp2_P6_26            | MT092633  | Grp2_G3_14            | MT093000  |
| Grp1_P6_28            | MT092098  | Grp1_G4_27            | MT092395  | Grp2_P6_27            | MT092634  | Grp2_G3_15            | MT093001  |
| Grp1_P6_29            | MT092099  | Grp1_G4_28            | MT092396  | Grp2_P6_28            | MT092635  | Grp2_G3_16            | MT093002  |
| Grp1_P6_30            | MT092100  | Grp1_G4_29            | MT092397  | Grp2_P6_29            | MT092636  | Grp2_G3_17            | MT093003  |
| Grp1_P10_1            | MT092101  | Grp1_G4_30            | MT092398  | Grp2_P6_30            | MT092637  | Grp2_G3_18            | MT093004  |
| Grp1_P10_2            | MT092102  | Grp1_G5_1             | MT092399  | Grp2_P10_1            | MT092638  | Grp2_G3_19            | MT093005  |
| Grp1_P10_3            | MT092103  | Grp1_G5_2             | MT092400  | Grp2_P10_2            | MT092639  | Grp2_G3_20            | MT093006  |
| Grp1_P10_4            | MT092104  | Grp1_G5_3             | MT092401  | Grp2_P10_3            | MT092640  | Grp2_G3_21            | MT093007  |
| Grp1_P10_5            | MT092105  | Grp1_G5_4             | MT092402  | Grp2_P10_4            | MT092641  | Grp2_G3_22            | MT093008  |
| Grp1_P10_6            | MT092106  | Grp1_G5_5             | MT092403  | Grp2_P10_5            | MT092642  | Grp2_G3_23            | MT093009  |
| Grp1_P10_7            | MT092107  | Grp1_G5_6             | MT092404  | Grp2_P10_6            | MT092643  | Grp2_G3_24            | MT093010  |
| Grp1_P10_8            | MT092108  | Grp1_G5_7             | MT092405  | Grp2_P10_7            | MT092644  | Grp2_G3_25            | MT093011  |
| Grp1_P10_9            | MT092109  | Grp1_G5_8             | MT092406  | Grp2_P10_8            | MT092645  | Grp2_G3_26            | MT093012  |
| Grp1_P10_10           | MT092110  | Grp1_G5_9             | MT092407  | Grp2_P10_9            | MT092646  | Grp2_G3_27            | MT093013  |
| Grp1_P10_11           | MT092111  | Grp1_G5_10            | MT092408  | Grp2_P10_10           | MT092647  | Grp2_G3_28            | MT093014  |
| Grp1_P10_12           | MT092112  | Grp1_G5_11            | MT092409  | Grp2_P10_11           | MT092648  | Grp2_G3_29            | MT093015  |
| Grp1_P10_13           | MT092113  | Grp1_G5_12            | MT092410  | Grp2_P10_12           | MT092649  | Grp2_G3_30            | MT093016  |
| Grp1_P10_14           | MT092114  | Grp1_G5_13            | MT092411  | Grp2_P10_13           | MT092650  | Grp2_G3_31            | MT093017  |
| Grp1_P10_15           | MT092115  | Grp1_G5_14            | MT092412  | Grp2_P10_14           | MT092651  | Grp2_G3_32            | MT093018  |
| Grp1_P10_16           | MT092116  | Grp1_G5_15            | MT092413  | Grp2_P10_15           | MT092652  | Grp2_G3_33            | MT093019  |
| Grp1_P10_17           | MT092117  | Grp1_G5_16            | MT092414  | Grp2_P10_16           | MT092653  | Grp2_G3_34            | MT093020  |
| Grp1_P10_18           | MT092118  | Grp1_G5_17            | MT092415  | Grp2_P10_17           | MT092654  | Grp2_G3_35            | MT093021  |
| Grp1_P10_19           | MT092119  | Grp1_G5_18            | MT092416  | Grp2_P10_18           | MT092655  | Grp2_G3_36            | MT093022  |
| Grp1_P10_20           | MT092120  | Grp1_G5_19            | MT092417  | Grp2_P10_19           | MT092656  | Grp2_G3_37            | MT093023  |
| Grp1_P10_21           | MT092121  | Grp1_G5_20            | MT092418  | Grp2_P10_20           | MT092657  | Grp2_G3_38            | MT093024  |
| Grp1_P10_22           | MT092122  | Grp1_G5_21            | MT092419  | Grp2_P10_21           | MT092658  | Grp2_G3_39            | MT093025  |
| Grp1_P10_23           | MT092123  | Grp1_G5_22            | MT092420  | Grp2_P10_22           | MT092659  | Grp2_G3_40            | MT093026  |
| Grp1_P10_24           | MT092124  | Grp1_G5_23            | MT092421  | Grp2_P10_23           | MT092660  | Grp2_G3_41            | MT093027  |
| Grp1_P10_25           | MT092125  | Grp1_G5_24            | MT092422  | Grp2_P10_24           | MT092661  | Grp2_G3_42            | MT093028  |
| Grp1_P10_26           | MT092126  | Grp1_G5_25            | MT092423  | Grp2_P10_25           | MT092662  | Grp2_G3_43            | MT093029  |
| Grp1_P10_27           | MT092127  | Grp1_G5_26            | MT092424  | Grp2_P10_26           | MT092663  | Grp2_G3_44            | MT093030  |
| Grp1_P10_28           | MT092128  | Grp1_G5_27            | MT092425  | Grp2_P10_27           | MT092664  | Grp2_G3_45            | MT093031  |
| Grp1_P10_29           | MT092129  | Grp1_G5_28            | MT092426  | Grp2_P10_28           | MT092665  | Grp2_G3_46            | MT093032  |
| Grp1_P7_1             | MT092130  | Grp1_G5_29            | MT092427  | Grp2_P10_29           | MT092666  | Grp2_G3_47            | MT093033  |
| Grp1_P7_2             | MT092131  | Grp1_G5_30            | MT092428  | Grp2_P10_30           | MT092667  | Grp2_G3_48            | MT093034  |
| Grp1_P7_3             | MT092132  | Grp1_G6_1             | MT092429  | Grp2_P7_1             | MT092668  | Grp2_G3_49            | MT093035  |
| Grp1_P7_4             | MT092133  | Grp1_G6_2             | MT092430  | Grp2_P7_2             | MT092669  | Grp2_G3_50            | MT093036  |
| Grp1_P7_5             | MT092134  | Grp1_G6_3             | MT092431  | Grp2_P7_3             | MT092670  | Grp2_G3_51            | MT093037  |
| Grp1_P7_6             | MT092135  | Grp1_G6_4             | MT092432  | Grp2_P7_4             | MT092671  | Grp2_G4_1             | MT093038  |
| Grp1_P7_7             | MT092136  | Grp1_G6_5             | MT092433  | Grp2_P7_5             | MT092672  | Grp2_G4_2             | MT093039  |
| Grp1_P7_8             | MT092137  | Grp1_G6_6             | MT092434  | Grp2_P7_6             | MT092673  | Grp2_G4_3             | MT093040  |
| Grp1_P7_9             | MT092138  | Grp1_G6_7             | MT092435  | Grp2_P7_7             | MT092674  | Grp2_G4_4             | MT093041  |
| Grp1_P7_10            | MT092139  | Grp1_G6_8             | MT092436  | Grp2_P7_8             | MT092675  | Grp2_G4_5             | MT093042  |
| Grp1_P7_11            | MT092140  | Grp1_G6_9             | MT092437  | Grp2_P7_9             | MT092676  | Grp2_G4_6             | MT093043  |
| Grp1_P7_12            | MT092141  | Grp1_G6_10            | MT092438  | Grp2_P7_10            | MT092677  | Grp2_G4_7             | MT093044  |
| Grp1_P7_13            | MT092142  | Grp1_G6_11            | MT092439  | Grp2_P7_11            | MT092678  | Grp2_G4_8             | MT093045  |
| Grp1_P7_14            | MT092143  | Grp1_G6_12            | MT092440  | Grp2_P7_12            | MT092679  | Grp2_G4_9             | MT093046  |
| Grp1_P7_15            | MT092144  | Grp1_G6_13            | MT092441  | Grp2_P7_13            | MT092680  | Grp2_G4_10            | MT093047  |
| Grp1_P7_16            | MT092145  | Grp1_G6_14            | MT092442  | Grp2_P7_14            | MT092681  | Grp2_G4_11            | MT093048  |
| Grp1_P7_17            | MT092146  | Grp1_G6_15            | MT092443  | Grp2_P7_15            | MT092682  | Grp2_G4_12            | MT093049  |
| Grp1_P7_18            | MT092147  | Grp1_G6_16            | MT092444  | Grp2_P7_16            | MT092683  | Grp2_G4_13            | MT093050  |
| Grp1_P7_19            | MT092148  | Grp1_G6_17            | MT092445  | Grp2_P7_17            | MT092684  | Grp2_G4_14            | MT093051  |
| Grp1_P7_20            | MT092149  | Grp1_G6_18            | MT092446  | Grp2_P7_18            | MT092685  | Grp2_G4_15            | MT093052  |
| Grp1_P7_21            | MT092150  | Grp1_G6_19            | MT092447  | Grp2_P7_19            | MT092686  | Grp2_G4_16            | MT093053  |
| Grp1_P7_22            | MT092151  | Grp1_G6_20            | MT092448  | Grp2_P7_20            | MT092687  | Grp2_G4_17            | MT093054  |
| Grp1_P7_23            | MT092152  | Grp1_G6_21            | MT092449  | Grp2_P7_21            | MT092688  | Grp2_G4_18            | MT093055  |
| Grp1_P7_24            | MT092153  | Grp1_G6_22            | MT092450  | Grp2_P7_22            | MT092689  | Grp2_G4_19            | MT093056  |

| (Phylogroup 1) in (P) |           | (Phylogroup 1) in (G) |           | (Phylogroup 2) in (P) |           | (Phylogroup 2) in (G) |           |
|-----------------------|-----------|-----------------------|-----------|-----------------------|-----------|-----------------------|-----------|
| Clone                 | Accession | Clone                 | Accession | Clone                 | Accession | Clone                 | Accession |
| Grp1_P7_25            | MT092154  | Grp1_G6_23            | MT092451  | Grp2_P7_23            | MT092690  | Grp2_G4_20            | MT093057  |
| Grp1_P7_26            | MT092155  | Grp1_G6_24            | MT092452  | Grp2_P7_24            | MT092691  | Grp2_G4_21            | MT093058  |
| Grp1_P7_27            | MT092156  | Grp1_G6_25            | MT092453  | Grp2_P7_25            | MT092692  | Grp2_G4_22            | MT093059  |
| Grp1_P7_28            | MT092157  | Grp1_G6_26            | MT092454  | Grp2_P7_26            | MT092693  | Grp2_G4_23            | MT093060  |
| Grp1_P7_29            | MT092158  | Grp1_G6_27            | MT092455  | Grp2_P7_27            | MT092694  | Grp2_G4_24            | MT093061  |
| Grp1_P7_30            | MT092159  | Grp1_G6_28            | MT092456  | Grp2_P7_28            | MT092695  | Grp2_G4_25            | MT093062  |
| Grp1_P2_1             | MT092160  | Grp1_G6_29            | MT092457  | Grp2_P7_29            | MT092696  | Grp2_G4_26            | MT093063  |
| Grp1_P2_2             | MT092161  | Grp1_G6_30            | MT092458  | Grp2_P7_30            | MT092697  | Grp2_G4_27            | MT093064  |
| Grp1_P2_3             | MT092162  | Grp1_G7_1             | MT092459  | Grp2_P7_31            | MT092698  | Grp2_G4_28            | MT093065  |
| Grp1_P2_4             | MT092163  | Grp1_G7_2             | MT092460  | Grp2_P7_32            | MT092699  | Grp2_G4_29            | MT093066  |
| Grp1_P2_5             | MT092164  | Grp1_G7_3             | MT092461  | Grp2_P7_33            | MT092700  | Grp2_G4_30            | MT093067  |
| Grp1_P2_6             | MT092165  | Grp1_G7_4             | MT092462  | Grp2_P7_34            | MT092701  | Grp2_G4_31            | MT093068  |
| Grp1_P2_7             | MT092166  | Grp1_G7_5             | MT092463  | Grp2_P7_35            | MT092702  | Grp2_G4_32            | MT093069  |
| Grp1_P2_8             | MT092167  | Grp1_G7_6             | MT092464  | Grp2_P7_36            | MT092703  | Grp2_G4_33            | MT093070  |
| Grp1_P2_9             | MT092168  | Grp1_G7_7             | MT092465  | Grp2_P7_37            | MT092704  | Grp2_G5_1             | MT093071  |
| Grp1_P2_10            | MT092169  | Grp1_G7_8             | MT092466  | Grp2_P7_38            | MT092705  | Grp2_G5_2             | MT093072  |
| Grp1_P2_11            | MT092170  | Grp1_G7_9             | MT092467  | Grp2_P7_39            | MT092706  | Grp2_G5_3             | MT093073  |
| Grp1_P2_12            | MT092171  | Grp1_G7_10            | MT092468  | Grp2_P7_40            | MT092707  | Grp2_G5_4             | MT093074  |
| Grp1_P2_13            | MT092172  | Grp1_G7_11            | MT092469  | Grp2_P7_41            | MT092708  | Grp2_G5_5             | MT093075  |
| Grp1_P2_14            | MT092173  | Grp1_G7_12            | MT092470  | Grp2_P7_42            | MT092709  | Grp2_G5_6             | MT093076  |
| Grp1_P2_15            | MT092174  | Grp1_G7_13            | MT092471  | Grp2_P7_43            | MT092710  | Grp2_G5_7             | MT093077  |
| Grp1_P2_16            | MT092175  | Grp1_G7_14            | MT092472  | Grp2_P7_44            | MT092711  | Grp2_G5_8             | MT093078  |
| Grp1_P2_17            | MT092176  | Grp1_G7_15            | MT092473  | Grp2_P7_45            | MT092712  | Grp2_G5_9             | MT093079  |
| Grp1_P2_18            | MT092177  | Grp1_G7_16            | MT092474  | Grp2_P7_46            | MT092713  | Grp2_G5_10            | MT093080  |
| Grp1_P2_19            | MT092178  | Grp1_G7_17            | MT092475  | Grp2_P2_1             | MT092714  | Grp2_G5_11            | MT093081  |
| Grp1_P2_20            | MT092179  | Grp1_G7_18            | MT092476  | Grp2_P2_2             | MT092715  | Grp2_G5_12            | MT093082  |
| Grp1_P2_21            | MT092180  | Grp1_G7_19            | MT092477  | Grp2_P2_3             | MT092716  | Grp2_G5_13            | MT093083  |
| Grp1_P2_22            | MT092181  | Grp1_G7_20            | MT092478  | Grp2_P2_4             | MT092717  | Grp2_G5_14            | MT093084  |
| Grp1_P2_23            | MT092182  | Grp1_G7_21            | MT092479  | Grp2_P2_5             | MT092718  | Grp2_G5_15            | MT093085  |
| Grp1_P2_24            | MT092183  | Grp1_G7_22            | MT092480  | Grp2_P2_6             | MT092719  | Grp2_G5_16            | MT093086  |
| Grp1_P2_25            | MT092184  | Grp1_G7_23            | MT092481  | Grp2_P2_7             | MT092720  | Grp2_G5_17            | MT093087  |
| Grp1_P2_26            | MT092185  | Grp1_G7_24            | MT092482  | Grp2_P2_8             | MT092721  | Grp2_G5_18            | MT093088  |
| Grp1_P2_27            | MT092186  | Grp1_G7_25            | MT092483  | Grp2_P2_9             | MT092722  | Grp2_G5_19            | MT093089  |
| Grp1_P2_28            | MT092187  | Grp1_G7_26            | MT092484  | Grp2_P2_10            | MT092723  | Grp2_G5_20            | MT093090  |
| Grp1_P2_29            | MT092188  | Grp1_G7_27            | MT092485  | Grp2_P2_11            | MT092724  | Grp2_G5_21            | MT093091  |
| Grp1_P2_30            | MT092189  | Grp1_G7_28            | MT092486  | Grp2_P2_12            | MT092725  | Grp2_G5_22            | MT093092  |
| Grp1_P8_1             | MT092190  | Grp1_G7_29            | MT092487  | Grp2_P2_13            | MT092726  | Grp2_G5_23            | MT093093  |
| Grp1_P8_2             | MT092191  | Grp1_G7_30            | MT092488  | Grp2_P2_14            | MT092727  | Grp2_G5_24            | MT093094  |
| Grp1_P8_3             | MT092192  | Grp1_G8_1             | MT092489  | Grp2_P2_15            | MT092728  | Grp2_G5_25            | MT093095  |
| Grp1_P8_4             | MT092193  | Grp1_G8_2             | MT092490  | Grp2_P2_16            | MT092729  | Grp2_G5_26            | MT093096  |
| Grp1_P8_5             | MT092194  | Grp1_G8_3             | MT092491  | Grp2_P2_17            | MT092730  | Grp2_G5_27            | MT093097  |
| Grp1_P8_6             | MT092195  | Grp1_G8_4             | MT092492  | Grp2_P2_18            | MT092731  | Grp2_G5_28            | MT093098  |
| Grp1_P8_7             | MT092196  | Grp1_G8_5             | MT092493  | Grp2_P2_19            | MT092732  | Grp2_G6_1             | MT093099  |
| Grp1_P8_8             | MT092197  | Grp1_G8_6             | MT092494  | Grp2_P2_20            | MT092733  | Grp2_G6_2             | MT093100  |
| Grp1_P8_9             | MT092198  | Grp1_G8_7             | MT092495  | Grp2_P2_21            | MT092734  | Grp2_G6_3             | MT093101  |
| Grp1_P8_10            | MT092199  | Grp1_G8_8             | MT092496  | Grp2_P2_22            | MT092735  | Grp2_G6_4             | MT093102  |
| Grp1_P8_11            | MT092200  | Grp1_G8_9             | MT092497  | Grp2_P2_23            | MT092736  | Grp2_G6_5             | MT093103  |
| Grp1_P8_12            | MT092201  | Grp1_G8_10            | MT092498  | Grp2_P2_24            | MT092737  | Grp2_G6_6             | MT093104  |
| Grp1_P8_13            | MT092202  | Grp1_G8_11            | MT092499  | Grp2_P2_25            | MT092738  | Grp2_G6_7             | MT093105  |
| Grp1_P8_14            | MT092203  | Grp1_G8_12            | MT092500  | Grp2_P2_26            | MT092739  | Grp2_G6_8             | MT093106  |
| Grp1_P8_15            | MT092204  | Grp1_G8_13            | MT092501  | Grp2_P2_27            | MT092740  | Grp2_G6_9             | MT093107  |
| Grp1_P8_16            | MT092205  | Grp1_G8_14            | MT092502  | Grp2_P2_28            | MT092741  | Grp2_G6_10            | MT093108  |
| Grp1_P8_17            | MT092206  | Grp1_G8_15            | MT092503  | Grp2_P2_29            | MT092742  | Grp2_G6_11            | MT093109  |
| Grp1_P8_18            | MT092207  | Grp1_G8_16            | MT092504  | Grp2_P2_30            | MT092743  | Grp2_G6_12            | MT093110  |
| Grp1_P8_19            | MT092208  | Grp1_G8_17            | MT092505  | Grp2_P2_31            | MT092744  | Grp2_G6_13            | MT093111  |
| Grp1_P8_20            | MT092209  | Grp1_G8_18            | MT092506  | Grp2_P2_32            | MT092745  | Grp2_G6_14            | MT093112  |
| Grp1_P8_21            | MT092210  | Grp1_G8_19            | MT092507  | Grp2_P2_33            | MT092746  | Grp2_G6_15            | MT093113  |
| Grp1_P8_22            | MT092211  | Grp1_G8_20            | MT092508  | Grp2_P8_1             | MT092747  | Grp2_G6_16            | MT093114  |
| Grp1_P8_23            | MT092212  | Grp1_G8_21            | MT092509  | Grp2_P8_2             | MT092748  | Grp2_G6_17            | MT093115  |
| Grp1_P8_24            | MT092213  | Grp1_G8_22            | MT092510  | Grp2_P8_3             | MT092749  | Grp2_G6_18            | MT093116  |

| (Phylogroup 1) in (P) |           | (Phylogroup 1) in (G) |           | (Phylogroup 2) in (P) |           | (Phylogroup 2) in (G) |           |
|-----------------------|-----------|-----------------------|-----------|-----------------------|-----------|-----------------------|-----------|
| Clone                 | Accession | Clone                 | Accession | Clone                 | Accession | Clone                 | Accession |
| Grp1_P8_25            | MT092214  | Grp1_G8_23            | MT092511  | Grp2_P8_4             | MT092750  | Grp2_G6_19            | MT093117  |
| Grp1_P8_26            | MT092215  | Grp1_G8_24            | MT092512  | Grp2_P8_5             | MT092751  | Grp2_G6_20            | MT093118  |
| Grp1_P8_27            | MT092216  | Grp1_G8_25            | MT092513  | Grp2_P8_6             | MT092752  | Grp2_G6_21            | MT093119  |
| Grp1_P8_28            | MT092217  | Grp1_G8_26            | MT092514  | Grp2_P8_7             | MT092753  | Grp2_G6_22            | MT093120  |
| Grp1_P8_29            | MT092218  | Grp1_G8_27            | MT092515  | Grp2_P8_8             | MT092754  | Grp2_G6_23            | MT093121  |
| Grp1_P8_30            | MT092219  | Grp1_G8_28            | MT092516  | Grp2_P8_9             | MT092755  | Grp2_G6_24            | MT093122  |
| Grp1_P3_1             | MT092220  | Grp1_G8_29            | MT092517  | Grp2_P8_10            | MT092756  | Grp2_G6_25            | MT093123  |
| Grp1_P3_2             | MT092221  |                       |           | Grp2_P8_11            | MT092757  | Grp2_G6_26            | MT093124  |
| Grp1_P3_3             | MT092222  |                       |           | Grp2_P8_12            | MT092758  | Grp2_G6_27            | MT093125  |
| Grp1_P3_4             | MT092223  |                       |           | Grp2_P8_13            | MT092759  | Grp2_G6_28            | MT093126  |
| Grp1_P3_5             | MT092224  |                       |           | Grp2_P8_14            | MT092760  | Grp2_G6_29            | MT093127  |
| Grp1_P3_6             | MT092225  |                       |           | Grp2_P8_15            | MT092761  | Grp2_G6_30            | MT093128  |
| Grp1_P3_7             | MT092226  |                       |           | Grp2_P8_16            | MT092762  | Grp2_G7_1             | MT093129  |
| Grp1_P3_8             | MT092227  |                       |           | Grp2_P8_17            | MT092763  | Grp2_G7_2             | MT093130  |
| Grp1_P3_9             | MT092228  |                       |           | Grp2_P8_18            | MT092764  | Grp2_G7_3             | MT093131  |
| Grp1_P3_10            | MT092229  |                       |           | Grp2_P8_19            | MT092765  | Grp2_G7_4             | MT093132  |
| Grp1_P3_11            | MT092230  |                       |           | Grp2_P8_20            | MT092766  | Grp2_G7_5             | MT093133  |
| Grp1_P3_12            | MT092231  |                       |           | Grp2_P8_21            | MT092767  | Grp2_G7_6             | MT093134  |
| Grp1_P3_13            | MT092232  |                       |           | Grp2_P8_22            | MT092768  | Grp2_G7_7             | MT093135  |
| Grp1_P3_14            | MT092233  |                       |           | Grp2_P8_23            | MT092769  | Grp2_G7_8             | MT093136  |
| Grp1_P3_15            | MT092234  |                       |           | Grp2_P8_24            | MT092770  | Grp2_G7_9             | MT093137  |
| Grp1_P3_16            | MT092235  |                       |           | Grp2_P8_25            | MT092771  | Grp2_G7_10            | MT093138  |
| Grp1_P3_17            | MT092236  |                       |           | Grp2_P8_26            | MT092772  | Grp2_G7_11            | MT093139  |
| Grp1_P3_18            | MT092237  |                       |           | Grp2_P8_27            | MT092773  | Grp2_G7_12            | MT093140  |
| Grp1_P3_19            | MT092238  |                       |           | Grp2_P8_28            | MT092774  | Grp2_G7_13            | MT093141  |
| Grp1_P3_20            | MT092239  |                       |           | Grp2_P8_29            | MT092775  | Grp2_G7_14            | MT093142  |
| Grp1_P3_21            | MT092240  |                       |           | Grp2_P8_30            | MT092776  | Grp2_G7_15            | MT093143  |
| Grp1_P3_22            | MT092241  |                       |           | Grp2_P8_31            | MT092777  | Grp2_G7_16            | MT093144  |
| Grp1_P3_23            | MT092242  |                       |           | Grp2_P8_32            | MT092778  | Grp2_G7_17            | MT093145  |
| Grp1_P3_24            | MT092243  |                       |           | Grp2_P8_33            | MT092779  | Grp2_G7_18            | MT093146  |
| Grp1_P3_25            | MT092244  |                       |           | Grp2_P8_34            | MT092780  | Grp2_G7_19            | MT093147  |
| Grp1_P3_26            | MT092245  |                       |           | Grp2_P8_35            | MT092781  | Grp2_G7_20            | MT093148  |
| Grp1_P3_27            | MT092246  |                       |           | Grp2_P8_36            | MT092782  | Grp2_G7_21            | MT093149  |
| Grp1_P3_28            | MT092247  |                       |           | Grp2_P8_37            | MT092783  | Grp2_G7_22            | MT093150  |
| Grp1_P3_29            | MT092248  |                       |           | Grp2_P8_38            | MT092784  | Grp2_G7_23            | MT093151  |
| Grp1_P3_30            | MT092249  |                       |           | Grp2_P8_39            | MT092785  | Grp2_G7_24            | MT093152  |
| Grp1_P9_1             | MT092250  |                       |           | Grp2_P8_40            | MT092786  | Grp2_G7_25            | MT093153  |
| Grp1_P9_2             | MT092251  |                       |           | Grp2_P8_41            | MT092787  | Grp2_G7_26            | MT093154  |
| Grp1_P9_3             | MT092252  |                       |           | Grp2_P8_42            | MT092788  | Grp2_G7_27            | MT093155  |
| Grp1_P9_4             | MT092253  |                       |           | Grp2_P8_43            | MT092789  | Grp2_G7_28            | MT093156  |
| Grp1_P9_5             | MT092254  |                       |           | Grp2_P8_44            | MT092790  | Grp2_G7_29            | MT093157  |
| Grp1_P9_6             | MT092255  |                       |           | Grp2_P8_45            | MT092791  | Grp2_G7_30            | MT093158  |
| Grp1_P9_7             | MT092256  |                       |           | Grp2_P8_46            | MT092792  | Grp2_G8_1             | MT093159  |
| Grp1_P9_8             | MT092257  |                       |           | Grp2_P8_47            | MT092793  | Grp2_G8_2             | MT093160  |
| Grp1_P9_9             | MT092258  |                       |           | Grp2_P8_48            | MT092794  | Grp2_G8_3             | MT093161  |
| Grp1_P9_10            | MT092259  |                       |           | Grp2_P8_49            | MT092795  | Grp2_G8_4             | MT093162  |
| Grp1_P9_11            | MT092260  |                       |           | Grp2_P8_50            | MT092796  | Grp2_G8_5             | MT093163  |
| Grp1_P9_12            | MT092261  |                       |           | Grp2_P3_1             | MT092797  | Grp2_G8_6             | MT093164  |
| Grp1_P9_13            | MT092262  |                       |           | Grp2_P3_2             | MT092798  | Grp2_G8_7             | MT093165  |
| Grp1_P9_14            | MT092263  |                       |           | Grp2_P3_3             | MT092799  | Grp2_G8_8             | MT093166  |
| Grp1_P9_15            | MT092264  |                       |           | Grp2_P3_4             | MT092800  | Grp2_G8_9             | MT093167  |
| Grp1_P9_16            | MT092265  |                       |           | Grp2_P3_5             | MT092801  | Grp2_G8_10            | MT093168  |
| Grp1_P9_17            | MT092266  |                       |           | Grp2_P3_6             | MT092802  | Grp2_G8_11            | MT093169  |
| Grp1_P9_18            | MT092267  |                       |           | Grp2_P3_7             | MT092803  | Grp2_G8_12            | MT093170  |
| Grp1_P9_19            | MT092268  |                       |           | Grp2_P3_8             | MT092804  | Grp2_G8_13            | MT093171  |
| Grp1_P9_20            | MT092269  |                       |           | Grp2_P3_9             | MT092805  | Grp2_G8_14            | MT093172  |
| Grp1_P9_21            | MT092270  |                       |           | Grp2_P3_10            | MT092806  | Grp2_G8_15            | MT093173  |
| Grp1_P9_22            | MT092271  |                       |           | Grp2_P3_11            | MT092807  | Grp2_G8_16            | MT093174  |
| Grp1_P9_23            | MT092272  |                       |           | Grp2_P3_12            | MT092808  | Grp2_G8_17            | MT093175  |
| Grp1_P9_24            | MT092273  |                       |           | Grp2_P3_13            | MT092809  | Grp2_G8_18            | MT093176  |

| (Phylogroup 1) in (P) |           | (Phylogroup 1) in (G) |           | (Phylogroup 2) in (P) |           | (Phylogroup 2) in (G) |           |
|-----------------------|-----------|-----------------------|-----------|-----------------------|-----------|-----------------------|-----------|
| Clone                 | Accession | Clone                 | Accession | Clone                 | Accession | Clone                 | Accession |
| Grp1_P9_25            | MT092274  |                       |           | Grp2_P3_14            | MT092810  | Grp2_G8_19            | MT093177  |
| Grp1_P9_26            | MT092275  |                       |           | Grp2_P3_15            | MT092811  | Grp2_G8_20            | MT093178  |
| Grp1_P9_27            | MT092276  |                       |           | Grp2_P3_16            | MT092812  | Grp2_G8_21            | MT093179  |
| Grp1_P9_28            | MT092277  |                       |           | Grp2_P3_17            | MT092813  | Grp2_G8_22            | MT093180  |
| Grp1_P9_29            | MT092278  |                       |           | Grp2_P3_18            | MT092814  | Grp2_G8_23            | MT093181  |
|                       |           |                       |           | Grp2_P3_19            | MT092815  | Grp2_G8_24            | MT093182  |
|                       |           |                       |           | Grp2_P3_20            | MT092816  | Grp2_G8_25            | MT093183  |
|                       |           |                       |           | Grp2_P3_21            | MT092817  | Grp2_G8_26            | MT093184  |
|                       |           |                       |           | Grp2_P3_22            | MT092818  |                       |           |
|                       |           |                       |           | Grp2_P3_23            | MT092819  |                       |           |
|                       |           |                       |           | Grp2_P3_24            | MT092820  |                       |           |
|                       |           |                       |           | Grp2_P3_25            | MT092821  |                       |           |
|                       |           |                       |           | Grp2_P3_26            | MT092822  |                       |           |
|                       |           |                       |           | Grp2_P3_27            | MT092823  |                       |           |
|                       |           |                       |           | Grp2_P3_28            | MT092824  |                       |           |
|                       |           |                       |           | Grp2_P3_29            | MT092825  |                       |           |
|                       |           |                       |           | Grp2_P3_30            | MT092826  |                       |           |
|                       |           |                       |           | Grp2_P3_31            | MT092827  |                       |           |
|                       |           |                       |           | Grp2_P3_32            | MT092828  |                       |           |
|                       |           |                       |           | Grp2_P3_33            | MT092829  |                       |           |
|                       |           |                       |           | Grp2_P3_34            | MT092830  |                       |           |
|                       |           |                       |           | Grp2_P3_35            | MT092831  |                       |           |
|                       |           |                       |           | Grp2_P3_36            | MT092832  |                       |           |
|                       |           |                       |           | Grp2_P9_1             | MT092833  |                       |           |
|                       |           |                       |           | Grp2_P9_2             | MT092834  |                       |           |
|                       |           |                       |           | Grp2_P9_3             | MT092835  |                       |           |
|                       |           |                       |           | Grp2_P9_4             | MT092836  |                       |           |
|                       |           |                       |           | Grp2_P9_5             | MT092837  |                       |           |
|                       |           |                       |           | Grp2_P9_6             | MT092838  |                       |           |
|                       |           |                       |           | Grp2_P9_7             | MT092839  |                       |           |
|                       |           |                       |           | Grp2_P9_8             | MT092840  |                       |           |
|                       |           |                       |           | Grp2_P9_9             | MT092841  |                       |           |
|                       |           |                       |           | Grp2_P9_10            | MT092842  |                       |           |
|                       |           |                       |           | Grp2_P9_11            | MT092843  |                       |           |
|                       |           |                       |           | Grp2_P9_12            | MT092844  |                       |           |
|                       |           |                       |           | Grp2_P9_13            | MT092845  |                       |           |
|                       |           |                       |           | Grp2_P9_14            | MT092846  |                       |           |
|                       |           |                       |           | Grp2_P9_15            | MT092847  |                       |           |
|                       |           |                       |           | Grp2_P9_16            | MT092848  |                       |           |
|                       |           |                       |           | Grp2_P9_17            | MT092849  |                       |           |
|                       |           |                       |           | Grp2_P9_18            | MT092850  |                       |           |
|                       |           |                       |           | Grp2_P9_19            | MT092851  |                       |           |
|                       |           |                       |           | Grp2_P9_20            | MT092852  |                       |           |
|                       |           |                       |           | Grp2_P9_21            | MT092853  |                       |           |
|                       |           |                       |           | Grp2_P9_22            | MT092854  |                       |           |
|                       |           |                       |           | Grp2_P9_23            | MT092855  |                       |           |
|                       |           |                       |           | Grp2_P9_24            | MT092856  |                       |           |
|                       |           |                       |           | Grp2_P9_25            | MT092857  |                       |           |
|                       |           |                       |           | Grp2_P9_26            | MT092858  |                       |           |
|                       |           |                       |           | Grp2_P9_27            | MT092859  |                       |           |
|                       |           |                       |           | Grp2_P9_28            | MT092860  |                       |           |
|                       |           |                       |           | Grp2_P9_29            | MT092861  |                       |           |
|                       |           |                       |           | Grp2_P9_30            | MT092862  |                       |           |
|                       |           |                       |           | Grp2_P9_31            | MT092863  |                       |           |
|                       |           |                       |           | Grp2_P9_32            | MT092864  |                       |           |
|                       |           |                       |           | Grp2_P9_33            | MT092865  |                       |           |
|                       |           |                       |           | Grp2_P9_34            | MT092866  |                       |           |
|                       |           |                       |           | Grp2_P9_35            | MT092867  |                       |           |
|                       |           |                       |           | Grp2_P9_36            | MT092868  |                       |           |
|                       |           |                       |           | Grp2_P9_37            | MT092869  |                       |           |

| (Phylogroup 1) in (P) |           | (Phylogroup 1) in (G) |           | (Phylogroup 2) in (P) |           | (Phylogroup 2) in (G) |           |
|-----------------------|-----------|-----------------------|-----------|-----------------------|-----------|-----------------------|-----------|
| Clone                 | Accession | Clone                 | Accession | Clone                 | Accession | Clone                 | Accession |
|                       |           |                       |           | Grp2_P9_38            | MT092870  |                       |           |
|                       |           |                       |           | Grp2_P9_39            | MT092871  |                       |           |
|                       |           |                       |           | Grp2_P9_40            | MT092872  |                       |           |
|                       |           |                       |           | Grp2_P9_41            | MT092873  |                       |           |
|                       |           |                       |           | Grp2_P9_42            | MT092874  |                       |           |
|                       |           |                       |           | Grp2_P9_43            | MT092875  |                       |           |
|                       |           |                       |           | Grp2_P9_44            | MT092876  |                       |           |
|                       |           |                       |           | Grp2_P9_45            | MT092877  |                       |           |
|                       |           |                       |           | Grp2_P9_46            | MT092878  |                       |           |
|                       |           |                       |           | Grp2_P9_47            | MT092879  |                       |           |
|                       |           |                       |           | Grp2_P9_48            | MT092880  |                       |           |
|                       |           |                       |           | Grp2_P9_49            | MT092881  |                       |           |
|                       |           |                       |           | Grp2_P9_50            | MT092882  |                       |           |
|                       |           |                       |           | Grp2_P9_51            | MT092883  |                       |           |
|                       |           |                       |           | Grp2_P9_52            | MT092884  |                       |           |

**(Phylogroup 1) in (P):** Name of treponeme phylogroup 1 *pyrH* genes identified in periodontitis (P) subjects. **(Phylogroup 1) in (G):** Name of treponeme phylogroup 1 *pyrH* genes identified in gingivitis (G) subjects. **(Phylogroup 2) in (P):** Name of treponeme phylogroup 2 *pyrH* genes identified in periodontitis (P) subjects. **(Phylogroup 2) in (G):** Name of treponeme phylogroup 2 *pyrH* genes identified in periodontitis (G) subjects. The identity of the clone is indicated, e.g. Grp1\_P1\_1 refers to the first clone of oral treponeme phylogroup 1 *pyrH* gene sequence from patient P1.
